# Supplementary material
Source: ML conference proceedings conference paper supplement (https://openreview.net/forum?id=mtxDl8S7vh)
Supplement: supplementary_material [file attachment]

## Supplementary Material of “Prompt Optimization Meets Subspace Representation Learning for Few-shot Out-of-Distribution Detection”

### A Notation

We use the following notation throughout the paper:  $x$ ,  $\mathbf{x}$ , and  $\mathbf{X}$ , represent a scalar, a vector, and a matrix, respectively.  $x_i$  denote the  $i$ th entry of the vector  $\mathbf{x}$ .  $\|\mathbf{x}\|_2$  mean the Euclidean norm.  $\mathbf{X}^{-1}$  means the inverse of a matrix  $\mathbf{X}$ .  $\mathbf{X}^\top$  denote transpose of the matrix  $\mathbf{X}$ .  $\mathbf{I}_M$  denotes an identity matrix of size  $M$ .

### B Additional Experiments

Figure 2 shows histogram plots of the OOD detection score computed for our method SubCoOp across four OOD datasets. The experiments are conducted using the ImageNet-1K dataset as the ID data, and the GL-MCM score is employed as the OOD detection score. Notably, the overlap between ID and OOD distributions is small across the OOD datasets, highlighting the ID-OOD separability achieved by our method.

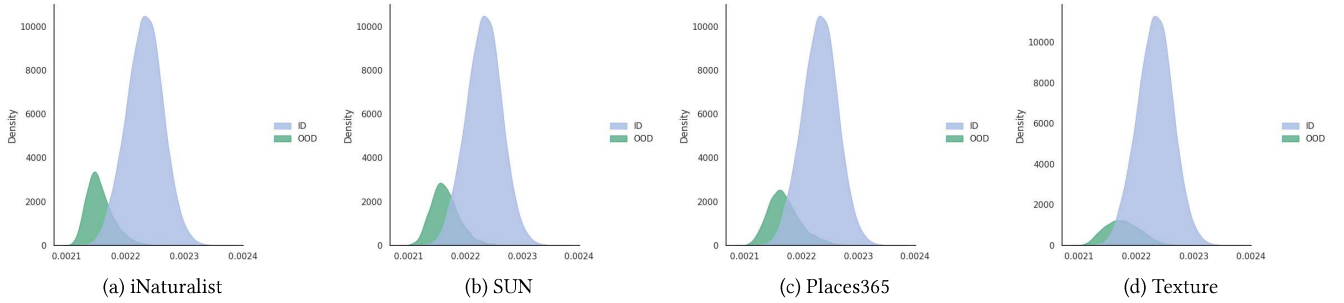

Figure 2: OOD score distribution histograms for different OOD datasets with ImageNet-1k ID dataset.

We present the ID classification performance of different methods in Table 2. Zero-shot and post-hoc methods achieve 66.7% ID accuracy on ImageNet-1K, while prompt tuning methods such as CoOp, NegPrompt, LSN, and LoCoOp improve it to around 72%. Our SubCoOp method achieves a comparable 71.63% ID accuracy while offering the best OOD detection performance. We highlight our OOD detection

Table 2: ID classification accuracy (%) with ImageNet-1k dataset

| Method                             | ID Accuracy |
|------------------------------------|-------------|
| <i>Zero-shot methods</i>           |             |
| MCM                                | 66.7        |
| GL-MCM                             | 66.7        |
| <i>CLIP-based post-hoc methods</i> |             |
| MSP                                | 66.7        |
| ODIN                               | 66.7        |
| Energy                             | 66.7        |
| ReAct                              | 66.7        |
| MaxLogit                           | 66.7        |
| <i>Prompt tuning based methods</i> |             |
| CoOp                               | 71.93       |
| NegPrompt                          | 71.93       |
| LSN                                | 71.93       |
| LoCoOp                             | 71.43       |
| SubCoOp                            | 71.63       |

performance on the ImageNet-100 dataset in Table 3. Similar to the results on ImageNet-1K, our method achieves the best OOD detection performance compared to state-of-the-art approaches.

**Table 3: Comparison of FPR95 and AUROC scores (%) on various OOD datasets with ID dataset ImageNet-100.**

| Method  | iNaturalist       |                  | SUN              |                  | Places            |                  | Texture          |                  | Average          |                  |
|---------|-------------------|------------------|------------------|------------------|-------------------|------------------|------------------|------------------|------------------|------------------|
|         | FPR↓              | AUROC↑           | FPR↓             | AUROC↑           | FPR↓              | AUROC↑           | FPR↓             | AUROC↑           | FPR↓             | AUROC↑           |
| CoOp    | 23.70 $\pm$ 6.29  | 96.67 $\pm$ 0.57 | 21.30 $\pm$ 6.00 | 96.53 $\pm$ 0.51 | 25.75 $\pm$ 2.37  | 95.28 $\pm$ 0.42 | 19.39 $\pm$ 1.27 | 96.85 $\pm$ 0.16 | 22.54 $\pm$ 3.98 | 96.33 $\pm$ 0.42 |
| LoCoOp  | 11.30 $\pm$ 10.01 | 97.99 $\pm$ 0.46 | 13.90 $\pm$ 7.35 | 96.92 $\pm$ 0.29 | 20.57 $\pm$ 10.13 | 95.50 $\pm$ 0.39 | 17.23 $\pm$ 8.56 | 96.16 $\pm$ 0.52 | 15.75 $\pm$ 9.01 | 96.64 $\pm$ 0.42 |
| SubCoOp | 5.03 $\pm$ 1.93   | 98.83 $\pm$ 0.28 | 9.70 $\pm$ 0.98  | 98.03 $\pm$ 0.23 | 15.06 $\pm$ 0.32  | 96.73 $\pm$ 0.07 | 16.59 $\pm$ 0.58 | 97.59 $\pm$ 0.31 | 11.60 $\pm$ 0.95 | 97.80 $\pm$ 0.22 |
